# Supplementary material
Source: Atypon-hosted journal article supplement (https://static.yanyin.tech/literature/current_protocol/10.1002/cpz1.745/attachments/downloadSupplement)
Supplement: downloadSupplement [file downloadSupplement]

## Sheet: GFP
	neg		positive		minus neg		norm			diff	corrected dif			Difference Index
channel	beads	cells	beads	GFP cells	GFP beads	cells	GFP beads	GFP cells						0.128236
UV1	777	147	807	238	30	91	0.000143277	0.00121324		0.00106996	0.0001163
UV2	1701	496	1661	851	-40	355	-0.000191037	0.00473295		0.00492399	0.000535216
UV3	793	1481	759	2386	-34	905	-0.000162381	0.0120657		0.0122281	0.00132914
UV4	751	2253	782	3680	31	1427	0.000148053	0.0190251		0.0188771	0.00205186
UV5	921	3369	985	5462	64	2093	0.000305659	0.0279044		0.0275988	0.00299987
UV6	1367	5628	1369	9237	2	3609	9.55183e-06	0.0481162		0.0481066	0.00522898
UV7	24631	12364	27383	18966	2752	6602	0.0131433	0.0880196		0.0748763	0.00813873
UV8	2055	5925	2553	10593	498	4668	0.00237841	0.062235		0.0598566	0.00650615
UV9	6617	4805	8739	8731	2122	3926	0.0101345	0.0523425		0.042208	0.00458782
UV10	8477	2466	9481	4010	1004	1544	0.00479502	0.020585		0.01579	0.0017163
UV11	3331	1040	5381	1913	2050	873	0.00979062	0.0116391		0.00184844	0.000200918
UV12	106	374	110	934	4	560	1.91037e-05	0.00746607		0.00744697	0.000809453
UV13	97	320	132	1011	35	691	0.000167157	0.0092126		0.00904544	0.0009832
UV14	122	371	146	985	24	614	0.000114622	0.00818601		0.00807139	0.000877325
UV15	112	295	110	685	-2	390	-9.55183e-06	0.00519958		0.00520914	0.00056621
UV16	127	242	113	469	-14	227	-6.68628e-05	0.00302642		0.00309329	0.000336227
V1	3021	891	3224	1386	203	495	0.000969511	0.00659947		0.00562996	0.000611952
V2	2309	1182	2026	2274	-283	1092	-0.00135158	0.0145588		0.0159104	0.00172939
V3	2772	1739	2535	3254	-237	1515	-0.00113189	0.0201984		0.0213303	0.00231851
V4	2341	1743	2212	3510	-129	1767	-0.000616093	0.0235581		0.0241742	0.00262763
V5	8192	3558	15856	13294	7664	9736	0.0366026	0.129803		0.0932003	0.0101305
V6	2031	2381	7785	10796	5754	8415	0.0274806	0.112191		0.0847104	0.00920765
V7	2935	3482	7684	13914	4749	10432	0.0226808	0.139082		0.116401	0.0126523
V8	15915	3808	14949	10641	-966	6833	-0.00461353	0.0910994		0.0957129	0.0104036
V9	1275	1886	2210	6722	935	4836	0.00446548	0.0644748		0.0600094	0.00652276
V10	1212	1886	2057	6601	845	4715	0.00403565	0.0628616		0.058826	0.00639413
V11	579	915	715	2922	136	2007	0.000649524	0.0267579		0.0261083	0.00283786
V12	347	537	437	1848	90	1311	0.000429832	0.0174786		0.0170488	0.00185313
V13	270	497	353	1795	83	1298	0.000396401	0.0173053		0.0169089	0.00183792
V14	233	429	310	1331	77	902	0.000367745	0.0120257		0.011658	0.00126717
V15	343	385	425	1035	82	650	0.000391625	0.00866597		0.00827435	0.000899386
V16	134	226	163	435	29	209	0.000138502	0.00278644		0.00264794	0.00028782
B1	1100	1577	210484	76583	209384	75006	1	1		0	0
B2	473	1458	147721	49862	147248	48404	0.703244	0.645335		0.0579088	0.00629443
B3	572	1643	80111	32226	79539	30583	0.379871	0.407741		0.0278693	0.00302927
B4	500	988	16253	6777	15753	5789	0.075235	0.0771805		0.00194552	0.000211469
B5	399	845	10587	4444	10188	3599	0.048657	0.0479828		0.000674185	7.3281e-05
B6	325	698	6238	2816	5913	2118	0.02824	0.0282377		2.23915e-06	2.43386e-07
B7	1945	699	4015	1769	2070	1070	0.00988614	0.0142655		0.00437938	0.00047602
B8	200	389	1100	984	900	595	0.00429832	0.0079327		0.00363438	0.000395041
B9	184	383	971	1074	787	691	0.00375864	0.0092126		0.00545395	0.000592821
B10	98	242	492	679	394	437	0.00188171	0.0058262		0.00394449	0.000428749
B11	115	190	296	387	181	197	0.00086444	0.00262646		0.00176202	0.000191523
B12	105	171	253	350	148	179	0.000706835	0.00238648		0.00167964	0.00018257
B13	63	162	199	260	136	98	0.000649524	0.00130656		0.000657038	7.14172e-05
B14	115	184	216	287	101	103	0.000482367	0.00137322		0.000890856	9.68322e-05
YG1	1397	490	1603	1008	206	518	0.000983838	0.00690611		0.00592228	0.000643726
YG2	537	330	813	925	276	595	0.00131815	0.0079327		0.00661455	0.000718972
YG3	642	373	811	990	169	617	0.000807129	0.00822601		0.00741888	0.0008064
YG4	2295	643	2639	1210	344	567	0.00164291	0.0075594		0.00591648	0.000643096
YG5	260	312	382	737	122	425	0.000582662	0.00566621		0.00508355	0.00055256
YG6	310	358	527	893	217	535	0.00103637	0.00713276		0.00609639	0.000662651
YG7	278	372	466	1106	188	734	0.000897872	0.00978588		0.00888801	0.000966088
YG8	118	187	158	496	40	309	0.000191037	0.00411967		0.00392863	0.000427025
YG9	121	171	198	408	77	237	0.000367745	0.00315975		0.002792	0.000303478
YG10	83	126	115	236	32	110	0.000152829	0.00146655		0.00131372	0.000142796
R1	529	145	557	295	28	150	0.000133726	0.00199984		0.00186611	0.000202839
R2	415	184	436	333	21	149	0.000100294	0.00198651		0.00188621	0.000205023
R3	444	201	513	482	69	281	0.000329538	0.00374637		0.00341683	0.000371394
R4	456	184	613	549	157	365	0.000749819	0.00486628		0.00411646	0.000447441
R5	329	164	448	368	119	204	0.000568334	0.00271978		0.00215145	0.000233853
R6	137	123	181	230	44	107	0.00021014	0.00142655		0.00121641	0.000132219
R7	223	139	334	274	111	135	0.000530126	0.00179986		0.00126973	0.000138014
R8	154	100	243	152	89	52	0.000425056	0.000693278		0.000268222	2.91545e-05
										1.17977	0.128236

## Sheet: CFP
	neg		positive		minus neg		norm			diff	corrected dif			Difference Index
channel	beads	cells	cfp beads	CFP cells	cfp beads	CFP cells	CFP beads	CFP cells		diff	/9.2			0.235159
UV1	777	754	762	512	-15	-242	-0.000154497	-0.00312552		0.00297103	0.000322938
UV2	1701	2846	1675	1664	-26	-1182	-0.000267796	-0.015266		0.0149982	0.00163024
UV3	793	8380	768	5475	-25	-2905	-0.000257496	-0.0375192		0.0372617	0.00405019
UV4	751	12444	800	8447	49	-3997	0.000504692	-0.0516228		0.0521275	0.00566603
UV5	921	19028	1063	13132	142	-5896	0.00146258	-0.0761491		0.0776117	0.00843606
UV6	1367	32518	2440	24655	1073	-7863	0.0110517	-0.101554		0.112605	0.0122397
UV7	24631	67708	30242	70004	5611	2296	0.0577923	0.0296537		0.0281386	0.00305854
UV8	2055	35630	3681	46529	1626	10899	0.0167475	0.140765		0.124017	0.0134801
UV9	6617	28567	9377	39674	2760	11107	0.0284275	0.143451		0.115024	0.0125026
UV10	8477	14320	9562	17481	1085	3161	0.0111753	0.0408256		0.0296502	0.00322285
UV11	3331	5699	5472	7410	2141	1711	0.0220519	0.0220982		4.63027e-05	5.03291e-06
UV12	106	2479	96	3145	-10	666	-0.000102998	0.00860165		0.00870465	0.000946157
UV13	97	2184	157	2642	60	458	0.00061799	0.00591525		0.00529726	0.000575789
UV14	122	2394	160	2939	38	545	0.000391393	0.00703889		0.00664749	0.000722554
UV15	112	1750	120	2035	8	285	8.23986e-05	0.00368089		0.00359849	0.00039114
UV16	127	1348	127	1531	0	183	0	0.00236352		0.00236352	0.000256904
V1	3021	4504	3245	4107	224	-397	0.00230716	-0.00512741		0.00743457	0.000808106
V2	2309	7446	2783	7479	474	33	0.00488212	0.000426208		0.00445591	0.000484338
V3	2772	10331	19488	22002	16716	11671	0.172172	0.150736		0.0214364	0.00233004
V4	2341	10438	71468	59589	69127	49151	0.711996	0.634804		0.0771918	0.00839041
V5	8192	17733	105281	95160	97089	77427	1	1		0	0
V6	2031	13801	69020	73371	66989	59570	0.689975	0.76937		0.0793947	0.00862986
V7	2935	20421	71158	94467	68223	74046	0.702685	0.956333		0.253648	0.0275704
V8	15915	19899	38980	57793	23065	37894	0.237566	0.489416		0.25185	0.027375
V9	1275	11058	19139	35888	17864	24830	0.183996	0.320689		0.136693	0.0148579
V10	1212	11080	15263	32778	14051	21698	0.144723	0.280238		0.135515	0.0147299
V11	579	5251	3612	12040	3033	6789	0.0312394	0.0876826		0.0564432	0.00613513
V12	347	3068	1479	6173	1132	3105	0.0116594	0.0401023		0.0284429	0.00309162
V13	270	2767	1105	5139	835	2372	0.00860036	0.0306353		0.022035	0.0023951
V14	233	2327	860	4050	627	1723	0.00645799	0.0222532		0.0157952	0.00171687
V15	343	2051	809	3171	466	1120	0.00479972	0.0144652		0.00966552	0.0010506
V16	134	1135	319	1623	185	488	0.00190547	0.00630271		0.00439724	0.000477961
B1	1100	2999	5658	12245	4558	9246	0.0469466	0.119416		0.0724691	0.00787708
B2	473	3099	2901	10273	2428	7174	0.025008	0.092655		0.067647	0.00735294
B3	572	3767	2132	10654	1560	6887	0.0160677	0.0889483		0.0728806	0.0079218
B4	500	2346	748	5308	248	2962	0.00255436	0.0382554		0.035701	0.00388055
B5	399	2054	573	4214	174	2160	0.00179217	0.0278972		0.0261051	0.00283751
B6	325	1812	417	3410	92	1598	0.000947584	0.0206388		0.0196912	0.00214035
B7	1945	1786	2470	2930	525	1144	0.00540741	0.0147752		0.0093678	0.00101824
B8	200	1054	197	1648	-3	594	-3.08995e-05	0.00767174		0.00770264	0.000837244
B9	184	1111	226	1665	42	554	0.000432593	0.00715513		0.00672253	0.00073071
B10	98	680	145	964	47	284	0.000484092	0.00366797		0.00318388	0.000346074
B11	115	464	85	674	-30	210	-0.000308995	0.00271223		0.00302123	0.000328394
B12	105	422	103	593	-2	171	-2.05997e-05	0.00220853		0.00222913	0.000242297
B13	63	346	90	475	27	129	0.000278095	0.00166609		0.00138799	0.000150868
B14	115	388	65	580	-50	192	-0.000514991	0.00247976		0.00299475	0.000325516
YG1	1397	2003	1710	1842	313	-161	0.00322385	-0.00207938		0.00530322	0.000576437
YG2	537	1684	910	1253	373	-431	0.00384184	-0.00556653		0.00940837	0.00102265
YG3	642	2025	874	1463	232	-562	0.00238956	-0.00725845		0.00964801	0.0010487
YG4	2295	2819	2747	2207	452	-612	0.00465552	-0.00790422		0.0125597	0.00136519
YG5	260	1653	452	1161	192	-492	0.00197757	-0.00635437		0.00833194	0.000905646
YG6	310	1615	585	1166	275	-449	0.00283245	-0.00579901		0.00863146	0.000938203
YG7	278	1941	489	1337	211	-604	0.00217326	-0.0078009		0.00997416	0.00108415
YG8	118	993	159	655	41	-338	0.000422293	-0.0043654		0.0047877	0.000520402
YG9	121	835	197	581	76	-254	0.000782787	-0.00328051		0.0040633	0.000441663
YG10	83	524	122	388	39	-136	0.000401693	-0.00175649		0.00215819	0.000234585
R1	529	748	502	442	-27	-306	-0.000278095	-0.00395211		0.00367401	0.000399349
R2	415	841	398	523	-17	-318	-0.000175097	-0.00410709		0.003932	0.000427391
R3	444	931	466	591	22	-340	0.000226596	-0.00439123		0.00461783	0.000501938
R4	456	950	573	579	117	-371	0.00120508	-0.00479161		0.00599669	0.000651814
R5	329	810	416	510	87	-300	0.000896085	-0.00387462		0.0047707	0.000518555
R6	137	535	175	340	38	-195	0.000391393	-0.0025185		0.00290989	0.000316293
R7	223	649	293	426	70	-223	0.000720988	-0.00288013		0.00360112	0.000391426
R8	154	388	230	253	76	-135	0.000782787	-0.00174358		0.00252636	0.000274605
										2.16346	0.235159

## Sheet: mCherry
	neg		positive		minus neg		norm			diff	corrected dif			Difference Index
channel	beads	cells	Cherry beads	Cherry cells	Cherry beads	Cherry cells	Cherry beads	Cherry cells		diff	/9.2			0.105963
UV1	777	147	481	162	-296	15	-0.00116119	0.000323109		0.0014843	0.000161337
UV2	1701	496	943	632	-758	136	-0.00297359	0.00292952		0.00590311	0.000641642
UV3	793	1481	495	1793	-298	312	-0.00116904	0.00672066		0.0078897	0.000857576
UV4	751	2253	516	2681	-235	428	-0.00092189	0.00921937		0.0101413	0.00110231
UV5	921	3369	630	3943	-291	574	-0.00114157	0.0123643		0.0135059	0.00146803
UV6	1367	5628	829	6578	-538	950	-0.00211054	0.0204636		0.0225741	0.00245371
UV7	24631	12364	15597	15545	-9034	3181	-0.0354398	0.0685206		0.10396	0.0113
UV8	2055	5925	1335	7033	-720	1108	-0.00282452	0.023867		0.0266915	0.00290125
UV9	6617	4805	5843	6648	-774	1843	-0.00303635	0.0396993		0.0427356	0.00464518
UV10	8477	2466	10183	5152	1706	2686	0.00669253	0.057858		0.0511655	0.00556146
UV11	3331	1040	5844	2491	2513	1451	0.00985834	0.0312554		0.021397	0.00232577
UV12	106	374	2029	1025	1923	651	0.00754381	0.0140229		0.00647911	0.000704251
UV13	97	320	1756	826	1659	506	0.00650815	0.0108995		0.00439138	0.000477324
UV14	122	371	1624	858	1502	487	0.00589225	0.0104903		0.00459801	0.000499784
UV15	112	295	1012	634	900	339	0.00353064	0.00730226		0.00377161	0.000409958
UV16	127	242	600	446	473	204	0.00185555	0.00439428		0.00253873	0.000275949
V1	3021	891	2949	1137	-72	246	-0.000282452	0.00529898		0.00558143	0.000606678
V2	2309	1182	2114	1449	-195	267	-0.000764973	0.00575134		0.00651631	0.000708294
V3	2772	1739	2616	2053	-156	314	-0.000611978	0.00676374		0.00737572	0.000801709
V4	2341	1743	2246	2169	-95	426	-0.000372679	0.00917629		0.00954897	0.00103793
V5	8192	3558	10560	4555	2368	997	0.00928952	0.021476		0.0121864	0.00132461
V6	2031	2381	1874	2852	-157	471	-0.000615901	0.0101456		0.0107615	0.00116973
V7	2935	3482	2587	4186	-348	704	-0.00136518	0.0151646		0.0165298	0.00179671
V8	15915	3808	12525	5573	-3390	1765	-0.0132988	0.0380191		0.0513179	0.00557803
V9	1275	1886	6310	3358	5035	1472	0.019752	0.0317077		0.0119557	0.00129954
V10	1212	1886	14048	4702	12836	2816	0.0503548	0.0606583		0.0103035	0.00111994
V11	579	915	7041	2285	6462	1370	0.02535	0.0295106		0.00416057	0.000452236
V12	347	537	4224	1253	3877	716	0.0152092	0.0154231		0.000213827	2.32421e-05
V13	270	497	3524	1026	3254	529	0.0127652	0.011395		0.00137027	0.000148943
V14	233	429	2300	839	2067	410	0.00810871	0.00883164		0.000722926	7.8579e-05
V15	343	385	1650	690	1307	305	0.00512728	0.00656988		0.0014426	0.000156804
V16	134	226	620	349	486	123	0.00190655	0.00264949		0.000742944	8.07548e-05
B1	1100	1577	1268	1514	168	-63	0.000659054	-0.00135706		0.00201611	0.000219142
B2	473	1458	733	1445	260	-13	0.00101996	-0.000280028		0.00129999	0.000141303
B3	572	1643	779	1649	207	6	0.000812048	0.000129243		0.000682805	7.42179e-05
B4	500	988	4830	1849	4330	861	0.0169863	0.0185464		0.00156012	0.000169578
B5	399	845	20726	4202	20327	3357	0.0797416	0.0723117		0.00742982	0.000807589
B6	325	698	34884	6004	34559	5306	0.135573	0.114294		0.0212785	0.00231288
B7	1945	699	27363	4511	25418	3812	0.0997132	0.0821127		0.0176005	0.0019131
B8	200	389	18869	3159	18669	2770	0.0732373	0.0596674		0.0135699	0.00147499
B9	184	383	18939	2765	18755	2382	0.0735747	0.0513097		0.022265	0.00242011
B10	98	242	10480	1482	10382	1240	0.0407279	0.0267103		0.0140176	0.00152365
B11	115	190	5981	966	5866	776	0.023012	0.0167155		0.00629646	0.000684398
B12	105	171	4570	873	4465	702	0.0175159	0.0151215		0.00239443	0.000260264
B13	63	162	3069	658	3006	496	0.0117924	0.0106841		0.00110822	0.000120459
B14	115	184	2866	674	2751	490	0.010792	0.0105549		0.000237117	2.57735e-05
YG1	1397	490	27607	5568	26210	5078	0.10282	0.109383		0.00656288	0.000713356
YG2	537	330	151929	28317	151392	27987	0.593901	0.602856		0.00895488	0.000973357
YG3	642	373	255553	46797	254911	46424	1	1		0	0
YG4	2295	643	178842	32842	176547	32199	0.692583	0.693585		0.00100231	0.000108947
YG5	260	312	132157	23062	131897	22750	0.517424	0.490048		0.0273755	0.0029756
YG6	310	358	118719	17143	118409	16785	0.464511	0.361559		0.102952	0.0111905
YG7	278	372	129458	17263	129180	16891	0.506765	0.363842		0.142923	0.0155351
YG8	118	187	52502	7728	52384	7541	0.205499	0.162438		0.0430616	0.00468061
YG9	121	171	35027	5282	34906	5111	0.136934	0.110094		0.0268402	0.00291741
YG10	83	126	16213	2653	16130	2527	0.063277	0.0544331		0.00884394	0.000961297
R1	529	145	1899	620	1370	475	0.00537442	0.0102318		0.00485735	0.000527973
R2	415	184	2088	690	1673	506	0.00656307	0.0108995		0.00433646	0.000471354
R3	444	201	2450	632	2006	431	0.00786941	0.00928399		0.00141458	0.000153758
R4	456	184	2235	501	1779	317	0.00697891	0.00682836		0.000150542	1.63632e-05
R5	329	164	1292	396	963	232	0.00377779	0.00499742		0.00121963	0.000132568
R6	137	123	647	270	510	147	0.0020007	0.00316647		0.00116577	0.000126714
R7	223	139	734	269	511	130	0.00200462	0.00280028		0.000795654	8.64842e-05
R8	154	100	396	176	242	76	0.000949351	0.00163708		0.000687733	7.47536e-05
										0.974859	0.105963

## Sheet: dTomato
	neg		positive		minus neg		norm			diff	corrected dif			Difference Index
channel	beads	cells	Tomato beads	tomato cells	Tomato beads	tomato cells	Tomato beads	tomato cells		diff	/9.2			0.0582655
UV1	777	90	763	100	-14	10	-8.84887e-06	6.48395e-05		7.36884e-05	8.0096e-06
UV2	1701	266	1582	260	-119	-6	-7.52154e-05	-3.89037e-05		3.63117e-05	3.94692e-06
UV3	793	705	733	647	-60	-58	-3.79237e-05	-0.000376069		0.000338145	3.67549e-05
UV4	751	989	699	887	-52	-102	-3.28672e-05	-0.000661363		0.000628496	6.83147e-05
UV5	921	1491	874	1305	-47	-186	-2.97069e-05	-0.00120601		0.00117631	0.00012786
UV6	1367	2428	1209	2091	-158	-337	-9.98658e-05	-0.00218509		0.00208522	0.000226655
UV7	24631	5568	23510	5104	-1121	-464	-0.000708542	-0.00300855		0.00230001	0.000250001
UV8	2055	2497	2806	2305	751	-192	0.000474679	-0.00124492		0.0017196	0.000186913
UV9	6617	2024	28938	5014	22321	2990	0.0141083	0.019387		0.00527875	0.000573777
UV10	8477	1136	22216	2823	13739	1687	0.0086839	0.0109384		0.00225452	0.000245057
UV11	3331	457	8949	1103	5618	646	0.00355092	0.00418863		0.000637706	6.93159e-05
UV12	106	143	2496	410	2390	267	0.00151063	0.00173121		0.000220586	2.39767e-05
UV13	97	141	1653	301	1556	160	0.000983489	0.00103743		5.39432e-05	5.86339e-06
UV14	122	125	1371	257	1249	132	0.000789446	0.000855881		6.64357e-05	7.22127e-06
UV15	112	111	831	188	719	77	0.000454453	0.000499264		4.48114e-05	4.87081e-06
UV16	127	89	503	124	376	35	0.000237655	0.000226938		1.07171e-05	1.16491e-06
V1	3021	366	2985	371	-36	5	-2.27542e-05	3.24197e-05		5.5174e-05	5.99717e-06
V2	2309	406	1990	403	-319	-3	-0.000201628	-1.94518e-05		0.000182176	1.98017e-05
V3	2772	590	2396	592	-376	2	-0.000237655	1.29679e-05		0.000250623	2.72417e-05
V4	2341	625	2144	653	-197	28	-0.000124516	0.000181551		0.000306067	3.32681e-05
V5	8192	1417	8328	1561	136	144	8.59604e-05	0.000933689		0.000847728	9.21444e-05
V6	2031	863	2260	958	229	95	0.000144742	0.000615975		0.000471233	5.1221e-05
V7	2935	1206	3632	1390	697	184	0.000440547	0.00119305		0.000752499	8.17934e-05
V8	15915	1583	60097	5544	44182	3961	0.0279258	0.0256829		0.00224285	0.000243788
V9	1275	607	41707	3967	40432	3360	0.0255555	0.0217861		0.00376947	0.000409725
V10	1212	592	44845	3971	43633	3379	0.0275788	0.0219093		0.0056695	0.00061625
V11	579	275	16026	1442	15447	1167	0.00976346	0.00756677		0.00219669	0.000238771
V12	347	166	6873	652	6526	486	0.00412484	0.0031512		0.000973638	0.00010583
V13	270	154	4695	474	4425	320	0.00279687	0.00207486		0.000722011	7.84795e-05
V14	233	141	2920	321	2687	180	0.00169835	0.00116711		0.00053124	5.77435e-05
V15	343	147	1921	237	1578	90	0.000997394	0.000583555		0.000413839	4.49825e-05
V16	134	71	741	113	607	42	0.000383662	0.000272326		0.000111336	1.21017e-05
B1	1100	387	8866	795	7766	408	0.00490859	0.00264545		0.00226314	0.000245994
B2	473	343	5413	648	4940	305	0.00312239	0.0019776		0.00114478	0.000124433
B3	572	359	15207	1529	14635	1170	0.00925023	0.00758622		0.00166401	0.000180871
B4	500	227	377187	29977	376687	29750	0.23809	0.192897		0.0451921	0.00491218
B5	399	187	369532	27934	369133	27747	0.233315	0.17991		0.0534048	0.00580487
B6	325	169	313425	22520	313100	22351	0.197899	0.144923		0.0529759	0.00575825
B7	1945	231	171436	12188	169491	11957	0.107129	0.0775286		0.0296003	0.00321742
B8	200	104	106418	7400	106218	7296	0.0671364	0.0473069		0.0198295	0.00215538
B9	184	116	86596	5935	86412	5819	0.0546178	0.0377301		0.0168877	0.00183561
B10	98	71	42383	2854	42285	2783	0.0267267	0.0180448		0.00868192	0.000943687
B11	115	62	23324	1586	23209	1524	0.0146695	0.00988154		0.00478799	0.000520434
B12	105	67	16569	1147	16464	1080	0.0104063	0.00700266		0.00340361	0.000369957
B13	63	43	10623	727	10560	684	0.00667458	0.00443502		0.00223955	0.00024343
B14	115	46	9682	641	9567	595	0.00604694	0.00385795		0.00218899	0.000237934
YG1	1397	326	1583520	154553	1582123	154227	1	1		0	0
YG2	537	186	1321441	122301	1320904	122115	0.834893	0.791787		0.0431059	0.00468543
YG3	642	158	1116674	98593	1116032	98435	0.705402	0.638248		0.067154	0.00729935
YG4	2295	366	576111	49663	573816	49297	0.362687	0.319639		0.0430481	0.00467914
YG5	260	159	355452	30020	355192	29861	0.224503	0.193617		0.0308862	0.0033572
YG6	310	197	247481	20706	247171	20509	0.156227	0.132979		0.0232481	0.00252697
YG7	278	150	231118	18882	230840	18732	0.145905	0.121457		0.0244479	0.00265738
YG8	118	72	86599	6924	86481	6852	0.0546614	0.044428		0.0102333	0.00111232
YG9	121	78	51960	4073	51839	3995	0.0327655	0.0259034		0.00686209	0.00074588
YG10	83	44	24276	1841	24193	1797	0.0152915	0.0116517		0.00363982	0.000395633
R1	529	178	735	89	206	-89	0.000130205	-0.000577071		0.000707276	7.68779e-05
R2	415	166	607	76	192	-90	0.000121356	-0.000583555		0.000704911	7.66208e-05
R3	444	132	576	73	132	-59	8.34322e-05	-0.000382553		0.000465985	5.06506e-05
R4	456	123	561	85	105	-38	6.63665e-05	-0.00024639		0.000312757	3.39953e-05
R5	329	95	405	63	76	-32	4.80367e-05	-0.000207486		0.000255523	2.77742e-05
R6	137	61	166	49	29	-12	1.83298e-05	-7.78074e-05		9.61372e-05	1.04497e-05
R7	223	63	258	49	35	-14	2.21222e-05	-9.07753e-05		0.000112897	1.22715e-05
R8	154	53	172	43	18	-10	1.13771e-05	-6.48395e-05		7.62166e-05	8.28441e-06
										0.536043	0.0582655

## Sheet: Venus
	neg		positive		minus neg		norm			diff	corrected dif			Difference Index
channel	beads	cells	Venus beads	Venus cells	Venus beads	Venus cells	Venus beads	Venus cells		diff	/9.2			0.0332833
UV1	777	754	807	540	30	-214	0.000177367	-0.000317233		0.0004946	5.37609e-05
UV2	1701	2846	1669	1872	-32	-974	-0.000189191	-0.00144386		0.00125467	0.000136377
UV3	793	8380	781	6090	-12	-2290	-7.09467e-05	-0.00339469		0.00332375	0.000361277
UV4	751	12444	780	9329	29	-3115	0.000171455	-0.00461767		0.00478913	0.000520557
UV5	921	19028	973	14246	52	-4782	0.000307436	-0.00708883		0.00739627	0.000803942
UV6	1367	32518	1330	24916	-37	-7602	-0.000218752	-0.0112692		0.0110504	0.00120114
UV7	24631	67708	28342	67523	3711	-185	0.0219403	-0.000274244		0.0222145	0.00241462
UV8	2055	35630	3876	46986	1821	11356	0.0107662	0.0168341		0.00606796	0.000659561
UV9	6617	28567	10579	37542	3962	8975	0.0234242	0.0133045		0.0101197	0.00109997
UV10	8477	14320	9842	16095	1365	1775	0.00807019	0.00263126		0.00543893	0.000591188
UV11	3331	5699	5516	6630	2185	931	0.0129182	0.00138011		0.0115381	0.00125414
UV12	106	2479	133	2800	27	321	0.00015963	0.00047585		0.00031622	3.43717e-05
UV13	97	2184	147	2356	50	172	0.000295611	0.000254973		4.06386e-05	4.41724e-06
UV14	122	2394	150	2569	28	175	0.000165542	0.00025942		9.38775e-05	1.02041e-05
UV15	112	1750	102	1819	-10	69	-5.91223e-05	0.000102286		0.000161408	1.75443e-05
UV16	127	1348	118	1359	-9	11	-5.321e-05	1.63064e-05		6.95164e-05	7.55613e-06
V1	3021	4504	3245	4024	224	-480	0.00132434	-0.000711552		0.00203589	0.000221292
V2	2309	7446	2004	6582	-305	-864	-0.00180323	-0.00128079		0.000522436	5.67865e-05
V3	2772	10331	2444	9982	-328	-349	-0.00193921	-0.000517357		0.00142185	0.000154549
V4	2341	10438	2070	11511	-271	1073	-0.00160221	0.00159061		0.00319283	0.000347047
V5	8192	17733	10679	27700	2487	9967	0.0147037	0.0147751		7.13668e-05	7.75726e-06
V6	2031	13801	3494	27355	1463	13554	0.00864959	0.0200924		0.0114429	0.00124379
V7	2935	20421	6231	44326	3296	23905	0.0194867	0.0354368		0.0159501	0.0017337
V8	15915	19899	14901	34998	-1014	15099	-0.005995	0.0223827		0.0283777	0.00308454
V9	1275	11058	1971	21228	696	10170	0.00411491	0.015076		0.0109611	0.00119142
V10	1212	11080	1819	20317	607	9237	0.00358872	0.0136929		0.0101042	0.00109828
V11	579	5251	697	8143	118	2892	0.000697643	0.0042871		0.00358946	0.000390158
V12	347	3068	413	4346	66	1278	0.000390207	0.00189451		0.0015043	0.000163511
V13	270	2767	329	3714	59	947	0.000348821	0.00140383		0.00105501	0.000114675
V14	233	2327	281	3033	48	706	0.000283787	0.00104657		0.000762787	8.29116e-05
V15	343	2051	413	2441	70	390	0.000413856	0.000578136		0.00016428	1.78565e-05
V16	134	1135	166	1244	32	109	0.000189191	0.000161582		2.76097e-05	3.00106e-06
B1	1100	2999	29920	148147	28820	145148	0.17039	0.215167		0.0447769	0.00486706
B2	473	3099	169614	677681	169141	674582	1	1		0	0
B3	572	3767	167705	653491	167133	649724	0.988128	0.963151		0.0249777	0.00271497
B4	500	2346	37804	149282	37304	146936	0.22055	0.217818		0.00273187	0.000296942
B5	399	2054	23106	80231	22707	78177	0.134249	0.11589		0.0183594	0.00199559
B6	325	1812	13064	45018	12739	43206	0.0753159	0.0640486		0.0112673	0.00122471
B7	1945	1786	5713	15570	3768	13784	0.0222773	0.0204334		0.00184388	0.000200421
B8	200	1054	1892	8707	1692	7653	0.0100035	0.0113448		0.00134131	0.000145795
B9	184	1111	1583	7086	1399	5975	0.00827121	0.00885734		0.000586131	6.37099e-05
B10	98	680	791	3419	693	2739	0.00409717	0.00406029		3.68812e-05	4.00883e-06
B11	115	464	468	1940	353	1476	0.00208702	0.00218802		0.000101005	1.09789e-05
B12	105	422	363	1562	258	1140	0.00152535	0.00168994		0.000164581	1.78892e-05
B13	63	346	263	1102	200	756	0.00118245	0.00112069		6.17514e-05	6.71211e-06
B14	115	388	270	1121	155	733	0.000916395	0.0010866		0.000170204	1.85004e-05
YG1	1397	2003	1826	2203	429	200	0.00253635	0.00029648		0.00223987	0.000243464
YG2	537	1684	911	1353	374	-331	0.00221117	-0.000490674		0.00270185	0.000293679
YG3	642	2025	891	1463	249	-562	0.00147214	-0.000833109		0.00230525	0.000250571
YG4	2295	2819	2734	2188	439	-631	0.00259547	-0.000935394		0.00353086	0.000383789
YG5	260	1653	403	1163	143	-490	0.000845448	-0.000726376		0.00157182	0.00017085
YG6	310	1615	538	1184	228	-431	0.00134799	-0.000638914		0.0019869	0.000215968
YG7	278	1941	484	1366	206	-575	0.00121792	-0.00085238		0.0020703	0.000225032
YG8	118	993	157	671	39	-322	0.000230577	-0.000477333		0.000707909	7.69467e-05
YG9	121	835	201	588	80	-247	0.000472978	-0.000366153		0.000839131	9.12099e-05
YG10	83	524	121	377	38	-147	0.000224665	-0.000217913		0.000442577	4.81062e-05
R1	529	748	555	452	26	-296	0.000153718	-0.00043879		0.000592508	6.44031e-05
R2	415	841	405	566	-10	-275	-5.91223e-05	-0.00040766		0.000348538	3.78845e-05
R3	444	931	487	634	43	-297	0.000254226	-0.000440273		0.000694498	7.5489e-05
R4	456	950	580	636	124	-314	0.000733116	-0.000465473		0.00119859	0.000130281
R5	329	810	434	534	105	-276	0.000620784	-0.000409142		0.00102993	0.000111948
R6	137	535	179	377	42	-158	0.000248314	-0.000234219		0.000482533	5.24492e-05
R7	223	649	322	451	99	-198	0.00058531	-0.000293515		0.000878826	9.55245e-05
R8	154	388	231	282	77	-106	0.000455241	-0.000157134		0.000612376	6.65626e-05
										0.306207	0.0332833

## Sheet: cfpcherry
	neg		positive		minus neg		norm			diff	corrected dif			Difference Index
channel	cfp	cherry	cfp	cherry	cfp beads	cherry beads	cfp beads	cherry beads		diff	/9.2			1.00021
UV1	777	777	729	481	-48	-296	-0.000269519	-0.00116119		0.000891671	9.69207e-05
UV2	1701	1701	1569	943	-132	-758	-0.000741177	-0.00297359		0.00223241	0.000242653
UV3	793	793	729	495	-64	-298	-0.000359359	-0.00116904		0.000809677	8.80083e-05
UV4	751	751	751	516	0	-235	0	-0.00092189		0.00092189	0.000100205
UV5	921	921	1073	630	152	-291	0.000853477	-0.00114157		0.00199505	0.000216853
UV6	1367	1367	3755	829	2388	-538	0.0134086	-0.00211054		0.0155191	0.00168686
UV7	24631	24631	27358	15597	2727	-9034	0.0153121	-0.0354398		0.0507519	0.00551651
UV8	2055	2055	5476	1335	3421	-720	0.0192088	-0.00282452		0.0220334	0.00239493
UV9	6617	6617	7692	5843	1075	-774	0.0060361	-0.00303635		0.00907246	0.000986137
UV10	8477	8477	8594	10183	117	1706	0.000656953	0.00669253		0.00603558	0.000656041
UV11	3331	3331	3128	5844	-203	2513	-0.00113984	0.00985834		0.0109982	0.00119545
UV12	106	106	123	2029	17	1923	9.54547e-05	0.00754381		0.00744835	0.000809604
UV13	97	97	95	1756	-2	1659	-1.123e-05	0.00650815		0.00651938	0.000708629
UV14	122	122	127	1624	5	1502	2.80749e-05	0.00589225		0.00586418	0.000637411
UV15	112	112	85	1012	-27	900	-0.000151604	0.00353064		0.00368225	0.000400244
UV16	127	127	94	600	-33	473	-0.000185294	0.00185555		0.00204084	0.000221831
V1	3021	3021	2820	2949	-201	-72	-0.00112861	-0.000282452		0.00084616	9.19739e-05
V2	2309	2309	4223	2114	1914	-195	0.0107471	-0.000764973		0.011512	0.00125131
V3	2772	2772	33476	2616	30704	-156	0.172402	-0.000611978		0.173014	0.0188059
V4	2341	2341	132816	2246	130475	-95	0.732615	-0.000372679		0.732987	0.0796725
V5	8192	8192	186287	10560	178095	2368	1	0.00928952		0.99071	0.107686
V6	2031	2031	134599	1874	132568	-157	0.744367	-0.000615901		0.744983	0.0809764
V7	2935	2935	140394	2587	137459	-348	0.77183	-0.00136518		0.773195	0.0840429
V8	15915	15915	67137	12525	51222	-3390	0.287611	-0.0132988		0.300909	0.0327075
V9	1275	1275	32506	6310	31231	5035	0.175361	0.019752		0.155609	0.0169141
V10	1212	1212	25086	14048	23874	12836	0.134052	0.0503548		0.0836972	0.00909752
V11	579	579	6051	7041	5472	6462	0.0307252	0.02535		0.00537515	0.000584256
V12	347	347	2549	4224	2202	3877	0.0123642	0.0152092		0.00284504	0.000309244
V13	270	270	1823	3524	1553	3254	0.00872007	0.0127652		0.00404517	0.000439693
V14	233	233	1256	2300	1023	2067	0.00574413	0.00810871		0.00236459	0.00025702
V15	343	343	1027	1650	684	1307	0.00384065	0.00512728		0.00128663	0.000139851
V16	134	134	428	620	294	486	0.0016508	0.00190655		0.000255743	2.77982e-05
B1	1100	1100	18341	1268	17241	168	0.0968079	0.000659054		0.0961488	0.010451
B2	473	473	9839	733	9366	260	0.0525899	0.00101996		0.0515699	0.00560543
B3	572	572	7785	779	7213	207	0.0405009	0.000812048		0.0396888	0.004314
B4	500	500	1967	4830	1467	4330	0.00823718	0.0169863		0.00874914	0.000950994
B5	399	399	1296	20726	897	20327	0.00503664	0.0797416		0.0747049	0.0081201
B6	325	325	802	34884	477	34559	0.00267835	0.135573		0.132894	0.0144451
B7	1945	1945	1934	27363	-11	25418	-6.17648e-05	0.0997132		0.099775	0.0108451
B8	200	200	254	18869	54	18669	0.000303209	0.0732373		0.0729341	0.00792762
B9	184	184	217	18939	33	18755	0.000185294	0.0735747		0.0733894	0.00797711
B10	98	98	142	10480	44	10382	0.000247059	0.0407279		0.0404809	0.0044001
B11	115	115	106	5981	-9	5866	-5.05348e-05	0.023012		0.0230625	0.00250679
B12	105	105	87	4570	-18	4465	-0.00010107	0.0175159		0.017617	0.00191489
B13	63	63	83	3069	20	3006	0.0001123	0.0117924		0.0116801	0.00126957
B14	115	115	115	2866	0	2751	0	0.010792		0.010792	0.00117304
YG1	1397	1397	1709	27607	312	26210	0.00175187	0.10282		0.101068	0.0109857
YG2	537	537	660	151929	123	151392	0.000690643	0.593901		0.593211	0.0644794
YG3	642	642	712	255553	70	254911	0.000393049	1		0.999607	0.108653
YG4	2295	2295	2146	178842	-149	176547	-0.000836632	0.692583		0.69342	0.0753717
YG5	260	260	293	132157	33	131897	0.000185294	0.517424		0.517238	0.0562216
YG6	310	310	314	118719	4	118409	2.24599e-05	0.464511		0.464489	0.0504879
YG7	278	278	296	129458	18	129180	0.00010107	0.506765		0.506664	0.0550722
YG8	118	118	111	52502	-7	52384	-3.93049e-05	0.205499		0.205538	0.0223411
YG9	121	121	104	35027	-17	34906	-9.54547e-05	0.136934		0.13703	0.0148945
YG10	83	83	65	16213	-18	16130	-0.00010107	0.063277		0.0633781	0.00688892
R1	529	529	501	1899	-28	1370	-0.000157219	0.00537442		0.00553164	0.000601266
R2	415	415	422	2088	7	1673	3.93049e-05	0.00656307		0.00652377	0.000709105
R3	444	444	392	2450	-52	2006	-0.000291979	0.00786941		0.00816139	0.000887108
R4	456	456	426	2235	-30	1779	-0.000168449	0.00697891		0.00714736	0.000776886
R5	329	329	308	1292	-21	963	-0.000117915	0.00377779		0.0038957	0.000423446
R6	137	137	124	647	-13	510	-7.29947e-05	0.0020007		0.00207369	0.000225401
R7	223	223	217	734	-6	511	-3.36899e-05	0.00200462		0.00203831	0.000221556
R8	154	154	149	396	-5	242	-2.80749e-05	0.000949351		0.000977426	0.000106242
										9.20193	1.00021

## Sheet: cherry new old
	neg		positive		minus neg		norm			diff	corrected dif			Difference Index
channel	beads	beads	new cherry	old cherry	new cherry	old cherry	new cherry	old cherry		diff	/9.2			0.0220093
UV1	777	777	733	735	-44	-42	-0.00049958	-0.000151964		0.000347616	3.77843e-05
UV2	1701	1701	1571	1578	-130	-123	-0.00147603	-0.000445038		0.00103099	0.000112065
UV3	793	793	747	766	-46	-27	-0.000522288	-9.76912e-05		0.000424597	4.61518e-05
UV4	751	751	736	777	-15	26	-0.000170311	9.4073e-05		0.000264384	2.87374e-05
UV5	921	921	927	932	6	11	6.81245e-05	3.98001e-05		2.83244e-05	3.07874e-06
UV6	1367	1367	1281	1300	-86	-67	-0.000976452	-0.000242419		0.000734033	7.97862e-05
UV7	24631	24631	24534	25174	-97	543	-0.00110135	0.00196468		0.00306603	0.000333264
UV8	2055	2055	2152	2120	97	65	0.00110135	0.000235183		0.000866164	9.41483e-05
UV9	6617	6617	7583	9182	966	2565	0.010968	0.00928067		0.00168738	0.000183411
UV10	8477	8477	11514	16908	3037	8431	0.0344824	0.030505		0.00397738	0.000432323
UV11	3331	3331	5419	8459	2088	5128	0.0237073	0.0185541		0.00515324	0.000560135
UV12	106	106	942	2461	836	2355	0.00949202	0.00852085		0.000971172	0.000105562
UV13	97	97	703	1745	606	1648	0.00688058	0.00596278		0.000917794	9.97603e-05
UV14	122	122	698	1737	576	1615	0.00653996	0.00584338		0.000696572	7.57144e-05
UV15	112	112	490	1108	378	996	0.00429185	0.00360372		0.000688125	7.47961e-05
UV16	127	127	331	725	204	598	0.00231623	0.00216368		0.000152554	1.6582e-05
V1	3021	3021	2993	3066	-28	45	-0.000317914	0.000162819		0.000480733	5.22536e-05
V2	2309	2309	1955	2059	-354	-250	-0.00401935	-0.000904548		0.0031148	0.000338565
V3	2772	2772	2490	2548	-282	-224	-0.00320185	-0.000810475		0.00239138	0.000259932
V4	2341	2341	2239	2188	-102	-153	-0.00115812	-0.000553584		0.000604533	6.57102e-05
V5	8192	8192	7637	7665	-555	-527	-0.00630152	-0.00190679		0.00439473	0.000477688
V6	2031	2031	2004	1879	-27	-152	-0.00030656	-0.000549965		0.000243405	2.64571e-05
V7	2935	2935	2887	2690	-48	-245	-0.000544996	-0.000886457		0.000341461	3.71153e-05
V8	15915	15915	16809	17717	894	1802	0.0101506	0.00651999		0.00363057	0.000394627
V9	1275	1275	3290	6939	2015	5664	0.0228785	0.0204934		0.00238504	0.000259243
V10	1212	1212	6425	15194	5213	13982	0.0591889	0.0505896		0.00859928	0.000934704
V11	579	579	3135	7247	2556	6668	0.0290211	0.0241261		0.00489493	0.000532058
V12	347	347	1642	3674	1295	3327	0.0147035	0.0120377		0.00266581	0.000289762
V13	270	270	1217	2690	947	2420	0.0107523	0.00875603		0.00199629	0.000216988
V14	233	233	900	1968	667	1735	0.00757318	0.00627757		0.00129561	0.000140827
V15	343	343	789	1495	446	1152	0.00506392	0.00416816		0.000895764	9.73657e-05
V16	134	134	330	632	196	498	0.0022254	0.00180186		0.000423541	4.60371e-05
B1	1100	1100	1459	1318	359	218	0.00407612	0.000788766		0.00328735	0.000357321
B2	473	473	1729	743	1256	270	0.0142607	0.000976912		0.0132838	0.00144389
B3	572	572	1755	761	1183	189	0.0134319	0.000683839		0.012748	0.00138566
B4	500	500	2226	5524	1726	5024	0.0195972	0.0181778		0.00141935	0.000154277
B5	399	399	7287	23595	6888	23196	0.078207	0.0839276		0.00572066	0.000621811
B6	325	325	11998	39196	11673	38871	0.132536	0.140643		0.00810653	0.000881145
B7	1945	1945	9950	28370	8005	26425	0.0908895	0.0956108		0.00472129	0.000513184
B8	200	200	6079	19527	5879	19327	0.0667507	0.0699288		0.00317814	0.00034545
B9	184	184	5299	16778	5115	16594	0.0580762	0.0600403		0.00196414	0.000213494
B10	98	98	2704	8480	2606	8382	0.0295888	0.0303277		0.000738945	8.03201e-05
B11	115	115	1679	5165	1564	5050	0.0177578	0.0182719		0.000514084	5.58787e-05
B12	105	105	1389	4139	1284	4034	0.0145786	0.0145958		1.71437e-05	1.86345e-06
B13	63	63	977	2869	914	2806	0.0103776	0.0101527		0.000224985	2.44549e-05
B14	115	115	1028	2871	913	2756	0.0103663	0.00997174		0.000394541	4.28849e-05
YG1	1397	1397	10283	30459	8886	29062	0.100892	0.105152		0.00425951	0.000462991
YG2	537	537	50991	164075	50454	163538	0.572859	0.591712		0.018853	0.00204924
YG3	642	642	88716	277023	88074	276381	1	1		0	0
YG4	2295	2295	62310	189172	60015	186877	0.681416	0.676157		0.00525844	0.000571569
YG5	260	260	43002	131616	42742	131356	0.485296	0.475271		0.010025	0.00108967
YG6	310	310	32049	96606	31739	96296	0.360367	0.348418		0.0119498	0.0012989
YG7	278	278	32249	97107	31971	96829	0.363002	0.350346		0.0126555	0.0013756
YG8	118	118	14033	41616	13915	41498	0.157992	0.150148		0.00784434	0.000852646
YG9	121	121	9545	27720	9424	27599	0.107001	0.0998585		0.0071424	0.000776348
YG10	83	83	4841	13951	4758	13868	0.0540228	0.0501771		0.00384564	0.000418005
R1	529	529	1023	1786	494	1257	0.00560892	0.00454807		0.00106085	0.00011531
R2	415	415	967	1812	552	1397	0.00626746	0.00505462		0.00121284	0.00013183
R3	444	444	890	1598	446	1154	0.00506392	0.0041754		0.000888528	9.65791e-05
R4	456	456	759	1263	303	807	0.00344029	0.00291988		0.000520407	5.65659e-05
R5	329	329	552	891	223	562	0.00253196	0.00203342		0.000498537	5.41888e-05
R6	137	137	272	478	135	341	0.0015328	0.0012338		0.000298998	3.24998e-05
R7	223	223	349	545	126	322	0.00143062	0.00116506		0.000265557	2.88649e-05
R8	154	154	224	312	70	158	0.000794786	0.000571675		0.000223112	2.42513e-05
										0.202486	0.0220093

## Sheet: cherry-cherry
	neg		positive		minus neg		norm			diff	corrected dif			Difference Index
channel	beads	beads	new cherry	new cherry	new cherry	old cherry	new cherry	old cherry		diff	/9.2			0
UV1	777	777	733	733	-44	-44	-0.00049958	-0.00049958		0	0
UV2	1701	1701	1571	1571	-130	-130	-0.00147603	-0.00147603		0	0
UV3	793	793	747	747	-46	-46	-0.000522288	-0.000522288		0	0
UV4	751	751	736	736	-15	-15	-0.000170311	-0.000170311		0	0
UV5	921	921	927	927	6	6	6.81245e-05	6.81245e-05		0	0
UV6	1367	1367	1281	1281	-86	-86	-0.000976452	-0.000976452		0	0
UV7	24631	24631	24534	24534	-97	-97	-0.00110135	-0.00110135		0	0
UV8	2055	2055	2152	2152	97	97	0.00110135	0.00110135		0	0
UV9	6617	6617	7583	7583	966	966	0.010968	0.010968		0	0
UV10	8477	8477	11514	11514	3037	3037	0.0344824	0.0344824		0	0
UV11	3331	3331	5419	5419	2088	2088	0.0237073	0.0237073		0	0
UV12	106	106	942	942	836	836	0.00949202	0.00949202		0	0
UV13	97	97	703	703	606	606	0.00688058	0.00688058		0	0
UV14	122	122	698	698	576	576	0.00653996	0.00653996		0	0
UV15	112	112	490	490	378	378	0.00429185	0.00429185		0	0
UV16	127	127	331	331	204	204	0.00231623	0.00231623		0	0
V1	3021	3021	2993	2993	-28	-28	-0.000317914	-0.000317914		0	0
V2	2309	2309	1955	1955	-354	-354	-0.00401935	-0.00401935		0	0
V3	2772	2772	2490	2490	-282	-282	-0.00320185	-0.00320185		0	0
V4	2341	2341	2239	2239	-102	-102	-0.00115812	-0.00115812		0	0
V5	8192	8192	7637	7637	-555	-555	-0.00630152	-0.00630152		0	0
V6	2031	2031	2004	2004	-27	-27	-0.00030656	-0.00030656		0	0
V7	2935	2935	2887	2887	-48	-48	-0.000544996	-0.000544996		0	0
V8	15915	15915	16809	16809	894	894	0.0101506	0.0101506		0	0
V9	1275	1275	3290	3290	2015	2015	0.0228785	0.0228785		0	0
V10	1212	1212	6425	6425	5213	5213	0.0591889	0.0591889		0	0
V11	579	579	3135	3135	2556	2556	0.0290211	0.0290211		0	0
V12	347	347	1642	1642	1295	1295	0.0147035	0.0147035		0	0
V13	270	270	1217	1217	947	947	0.0107523	0.0107523		0	0
V14	233	233	900	900	667	667	0.00757318	0.00757318		0	0
V15	343	343	789	789	446	446	0.00506392	0.00506392		0	0
V16	134	134	330	330	196	196	0.0022254	0.0022254		0	0
B1	1100	1100	1459	1459	359	359	0.00407612	0.00407612		0	0
B2	473	473	1729	1729	1256	1256	0.0142607	0.0142607		0	0
B3	572	572	1755	1755	1183	1183	0.0134319	0.0134319		0	0
B4	500	500	2226	2226	1726	1726	0.0195972	0.0195972		0	0
B5	399	399	7287	7287	6888	6888	0.078207	0.078207		0	0
B6	325	325	11998	11998	11673	11673	0.132536	0.132536		0	0
B7	1945	1945	9950	9950	8005	8005	0.0908895	0.0908895		0	0
B8	200	200	6079	6079	5879	5879	0.0667507	0.0667507		0	0
B9	184	184	5299	5299	5115	5115	0.0580762	0.0580762		0	0
B10	98	98	2704	2704	2606	2606	0.0295888	0.0295888		0	0
B11	115	115	1679	1679	1564	1564	0.0177578	0.0177578		0	0
B12	105	105	1389	1389	1284	1284	0.0145786	0.0145786		0	0
B13	63	63	977	977	914	914	0.0103776	0.0103776		0	0
B14	115	115	1028	1028	913	913	0.0103663	0.0103663		0	0
YG1	1397	1397	10283	10283	8886	8886	0.100892	0.100892		0	0
YG2	537	537	50991	50991	50454	50454	0.572859	0.572859		0	0
YG3	642	642	88716	88716	88074	88074	1	1		0	0
YG4	2295	2295	62310	62310	60015	60015	0.681416	0.681416		0	0
YG5	260	260	43002	43002	42742	42742	0.485296	0.485296		0	0
YG6	310	310	32049	32049	31739	31739	0.360367	0.360367		0	0
YG7	278	278	32249	32249	31971	31971	0.363002	0.363002		0	0
YG8	118	118	14033	14033	13915	13915	0.157992	0.157992		0	0
YG9	121	121	9545	9545	9424	9424	0.107001	0.107001		0	0
YG10	83	83	4841	4841	4758	4758	0.0540228	0.0540228		0	0
R1	529	529	1023	1023	494	494	0.00560892	0.00560892		0	0
R2	415	415	967	967	552	552	0.00626746	0.00626746		0	0
R3	444	444	890	890	446	446	0.00506392	0.00506392		0	0
R4	456	456	759	759	303	303	0.00344029	0.00344029		0	0
R5	329	329	552	552	223	223	0.00253196	0.00253196		0	0
R6	137	137	272	272	135	135	0.0015328	0.0015328		0	0
R7	223	223	349	349	126	126	0.00143062	0.00143062		0	0
R8	154	154	224	224	70	70	0.000794786	0.000794786		0	0
										0	0
